# Supplementary material for: Comparison of Nonheme Manganese- and Iron-Containing Flavone Synthase Mimics
Source: MDPI journal article supplement (doi:10.3390/molecules26113220), 2021-05-27
Supplement: s1 [file s1]

## Comparison of Nonheme Manganese- and Iron-Containing Flavone Synthase Mimics

Dóra Lakk-Bogáth<sup>1</sup>, Natalija Pantalon Juraj<sup>2</sup>, Bashdar I. Meena<sup>1</sup>, Berislav Perić,<sup>2</sup>  
Srećko I. Kirin<sup>2</sup> and József Kaizer<sup>1,\*</sup>

<sup>1</sup> *Research Group of Bioinorganic and Biocoordination Chemistry, University of Pannonia, H-8201 Veszprém, Hungary*

<sup>2</sup> *Division of Materials Chemistry, Ruđer Bošković Institute, Bijenička c. 54, HR-10000 Zagreb, Croatia*

\* *Correspondence: kaizer@almos.uni-pannon.hu; Tel.: +36-88-62 4720.*

### Experimental

#### General remarks

Reactions were carried out in ordinary glassware and chemicals were used as purchased from commercial suppliers without further purification. Synthesis of the ligand was carried out in a microwave reactor (CEM Discover), monitored by TLC on aluminum oxide 60 F<sub>254</sub> neutral plates and detected with UV lamp (254 nm). Mass spectra were recorded on a HPLC-MS system (Agilent Technologies 1200) coupled with a 6410 Triple-Quadrupole mass spectrometer, operating in a positive ESI mode. NMR spectra were obtained on a Bruker Avance 300 or 600 spectrometer, operating at 300 or 600 MHz for <sup>1</sup>H and 75 or 150 MHz for <sup>13</sup>C. The spectra are recorded at room temperature. Chemical shifts,  $\delta$  (ppm), indicate a downfield shift from the residual solvent signal ( $\delta_H$ : 1.94 ppm,  $\delta_C$ : 118.26 ppm for CD<sub>3</sub>CN and  $\delta_H$ : 7.26 ppm,  $\delta_C$ : 77.16 ppm for CDCl<sub>3</sub>). Coupling constants,  $J$ , are given in Hz.

#### Synthesis of ligands 1a-2b, General procedure

The synthesis was performed according to a modified previously reported procedure<sup>1</sup>. The amine (1 eq), K<sub>2</sub>CO<sub>3</sub> (12 eq), 2-(chloromethyl)pyridine hydrochloride or 2-(chloromethyl)quinoline hydrochloride (4 eq) and KI (1 eq) were suspended in 50 mL of acetonitrile. The reaction mixture was heated in a microwave reactor (50 W, reflux) for 1 hour. The solvent was evaporated in a vacuum, the residue suspended in ethyl acetate and washed three times with brine and saturated NaHCO<sub>3</sub>, the organic layer dried over anhydrous sodium sulfate, filtered and evaporated in a vacuum. The crude ligand was purified by automated flash chromatography on a pre-packed neutral alumina column (48 g).

[1] Y. Mikata, Y. Sato, S. Takeuchi, Y. Kuroda, H. Konno and S. Iwatsuki, *Dalton Trans.*, 2013, **42**, 9688–9698.

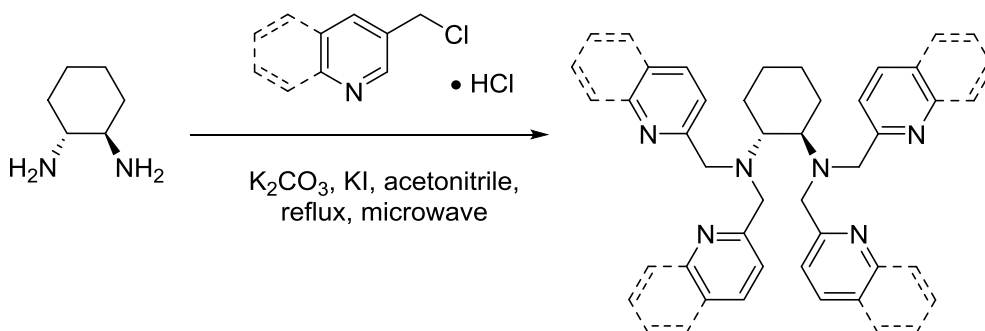

Synthesis of ligands **1a-2b** ( $\pm$ cda-bpa, and  $\pm$ cda-bqa). Ligands **1a** and **2a** are racemic and ligands **1b** and **2b** are (1*R*, 2*R*) isomers.

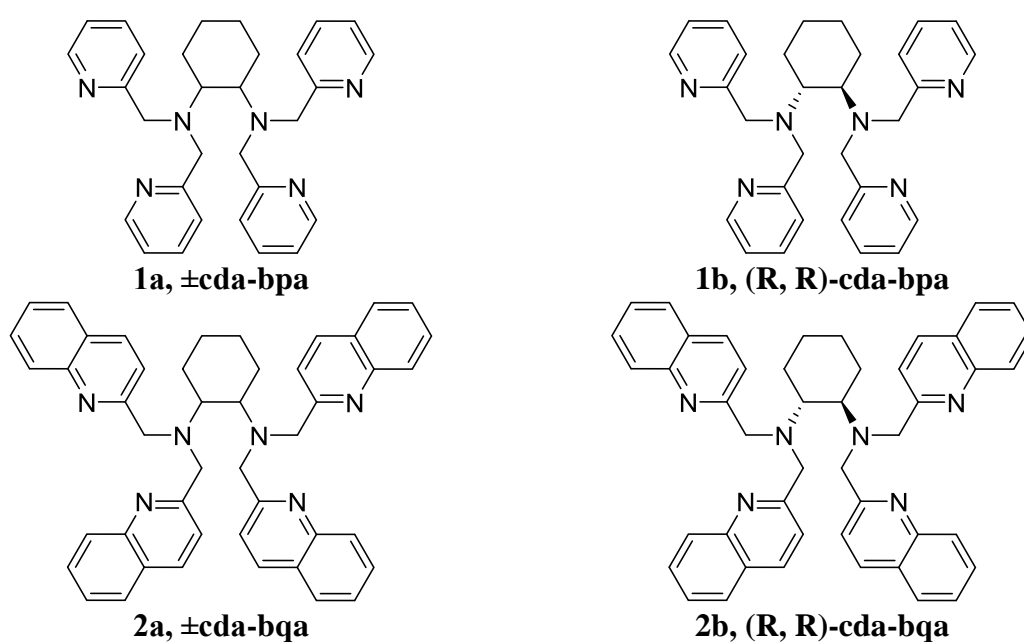

**Figure S1. Ligands 1a ( $\pm$ cda-bpa)-2b ( $\pm$ cda-bqa)**

#### $\pm$ cda-bpa, **1a**

(±)-*trans*-1,2-Diaminocyclohexane (120.0  $\mu$ L, 1.0 mmol),  $K_2CO_3$  ( 1658.4 mg, 12.0 mmol), 2-(chloromethyl)pyridine hydrochloride ( 656.2 mg, 4.0 mmol), KI ( 166.0 mg, 1.0 mmol). Automated flash chromatography 0  $\rightarrow$  5% dichloromethane in methanol ( $R_f$  = 0.42, 5 % dichloromethane in methanol). Yield: 303.0 mg (0.6 mmol, 63 %), brown oil.

#### (R, R)-cda-bpa, **1b**

(1*R*,2*R*)-(-)-1,2-Diaminocyclohexane ( 114.2 mg, 1.0 mmol),  $K_2CO_3$  ( 1658.4 mg, 12.0 mmol), 2-(chloromethyl)pyridine hydrochloride ( 656.2 mg, 4.0 mmol), KI ( 166.0 mg, 1.0 mmol). Automated flash chromatography 0  $\rightarrow$  5 % dichloromethane in methanol. Yield: 337.5 mg (0.7 mmol, 71 %), light brown powder.

$^1H$  NMR (300 MHz,  $CD_3CN$ )  $\delta$ : 8.39 (d,  $J$  = 4.7 Hz, 4H), 7.61 (d,  $J$  = 7.8 Hz, 4H), 7.55 – 7.41 (m, 4H), 7.18 – 7.03 (m, 4H), 3.70 (d,  $J$  = 14.3 Hz, 4H), 3.58 (d,  $J$  = 14.3 Hz, 4H), 2.85 – 2.66 (m, 2H), 1.79 – 1.61 (m, 2H), 1.36 – 1.23 (m, 1H), 1.23 – 1.00 (m, 4H), 0.96 – 0.79 (m, 1H).

$^{13}\text{C}$  NMR (75 MHz,  $\text{CD}_3\text{CN}$ )  $\delta$ : 161.6, 149.5, 136.7, 124.5, 122.6, 60.8, 56.5, 26.8, 25.7.  
ESI-MS ( $m/z$ ): 479.2 ( $\text{M}+\text{H}^+$ , 100%).

#### $\pm\text{cda-bqa}$ , **2a**

( $\pm$ )-*trans*-1,2-Diaminocyclohexane (70.5  $\mu\text{L}$ , 0.6 mmol),  $\text{K}_2\text{CO}_3$  (970.2 mg, 7.0 mmol), 2-(chloromethyl)quinoline hydrochloride (500.0 mg, 2.3 mmol), KI (96.3 mg, 0.6 mmol). No further purification was required, ( $R_f$  = 0.28, ethyl acetate:hexane 1:1). Yield: 372.3 mg (0.5 mmol, 94 %), yellow powder.

#### (**R, R**)-*cda-bqa*, **2b**

(1*R*,2*R*)-(-)-1,2-Diaminocyclohexane (44.5 mg, 0.4 mmol),  $\text{K}_2\text{CO}_3$  (651.6 mg, 4.7 mmol), 2-(chloromethyl)quinoline hydrochloride (378.9 mg, 1.6 mmol), KI (64.7 mg, 0.4 mmol). Automated flash chromatography 10  $\rightarrow$  40% ethyl acetate in hexane. Yield: 202.3 mg (0.3 mmol, 76 %), light yellow powder.

$^1\text{H}$  NMR (300 MHz,  $\text{CDCl}_3$ )  $\delta$ : 7.99 (d,  $J$  = 8.3 Hz, 4H), 7.91 (d,  $J$  = 8.5 Hz, 4H), 7.77 (d,  $J$  = 8.5 Hz, 4H), 7.72 – 7.59 (m, 8H), 7.52 – 7.41 (m, 4H), 4.01 (d,  $J$  = 14.1 Hz, 4H), 3.85 (d,  $J$  = 14.1 Hz, 4H), 3.00 – 2.81 (m, 2H), 2.49 – 2.27 (m, 2H), 1.88 – 1.69 (m, 2H), 1.25 – 0.94 (m, 4H).

$^{13}\text{C}$  NMR (75 MHz,  $\text{CDCl}_3$ )  $\delta$ : 161.3, 147.7, 135.8, 129.3, 129.1, 127.6, 127.4, 126.1, 122.2, 60.7, 56.6, 29.8, 26.0, 24.4.

ESI-MS ( $m/z$ ): 679.4 ( $\text{M}+\text{H}^+$ , 100%).

#### ESI-MS of **1**

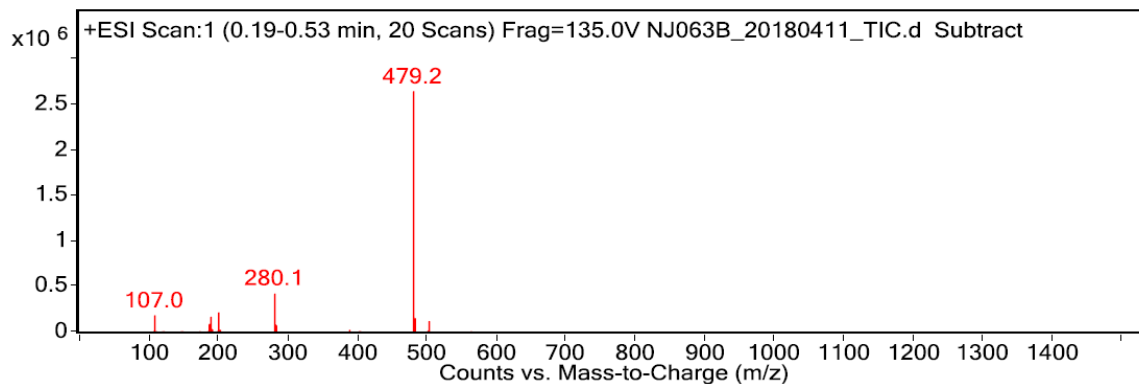

#### ESI-MS of **2**

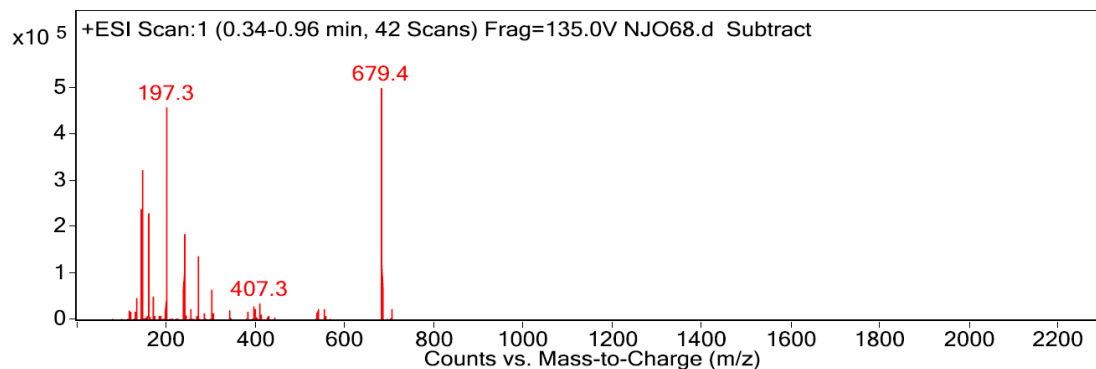

$^1\text{H}$  NMR (300 MHz,  $\text{CD}_3\text{CN}$ ) of **1**

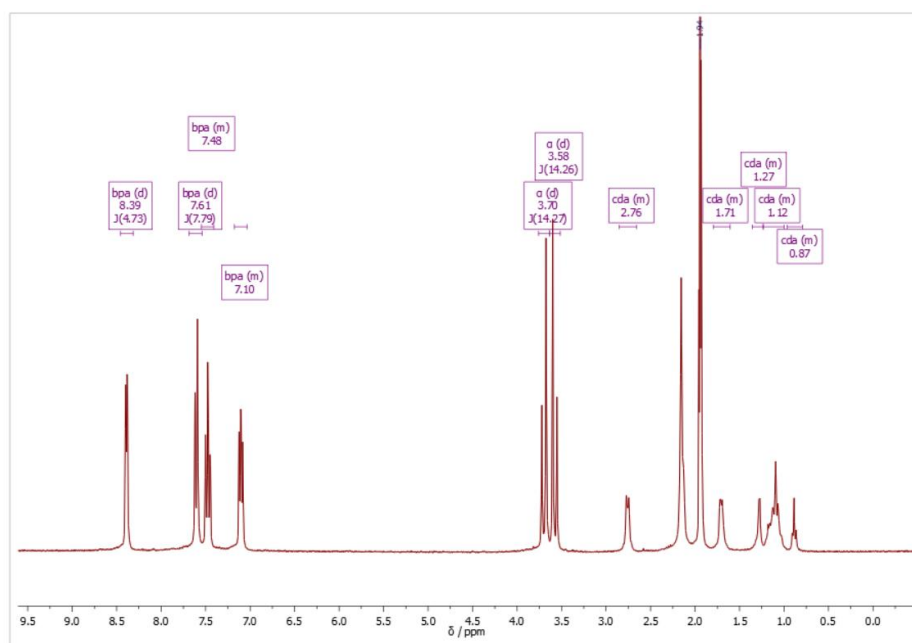

$^{13}\text{C}$  NMR (75 MHz,  $\text{CD}_3\text{CN}$ ) of **1**

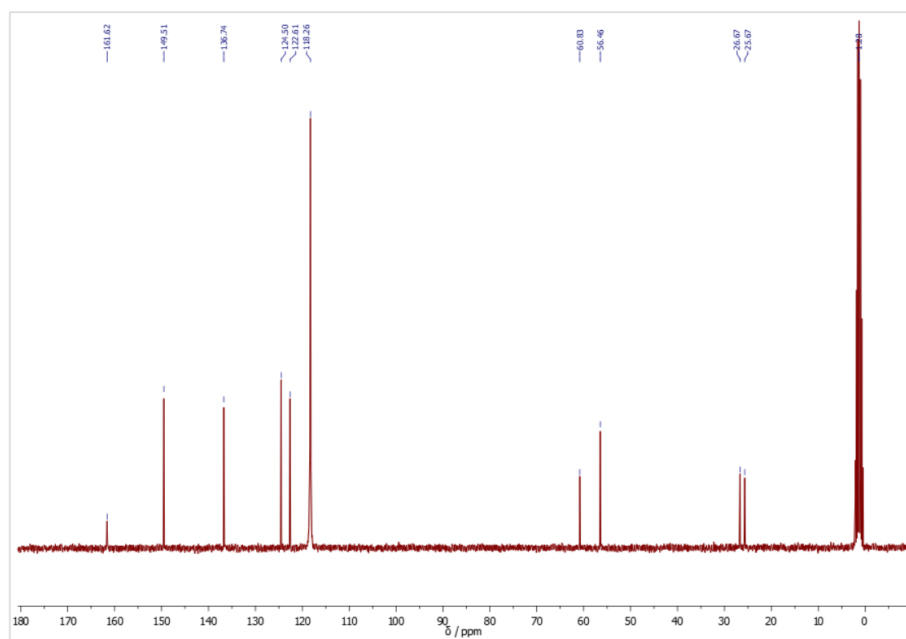

$^1\text{H}$  NMR (300 MHz,  $\text{CDCl}_3$ ) of **2**

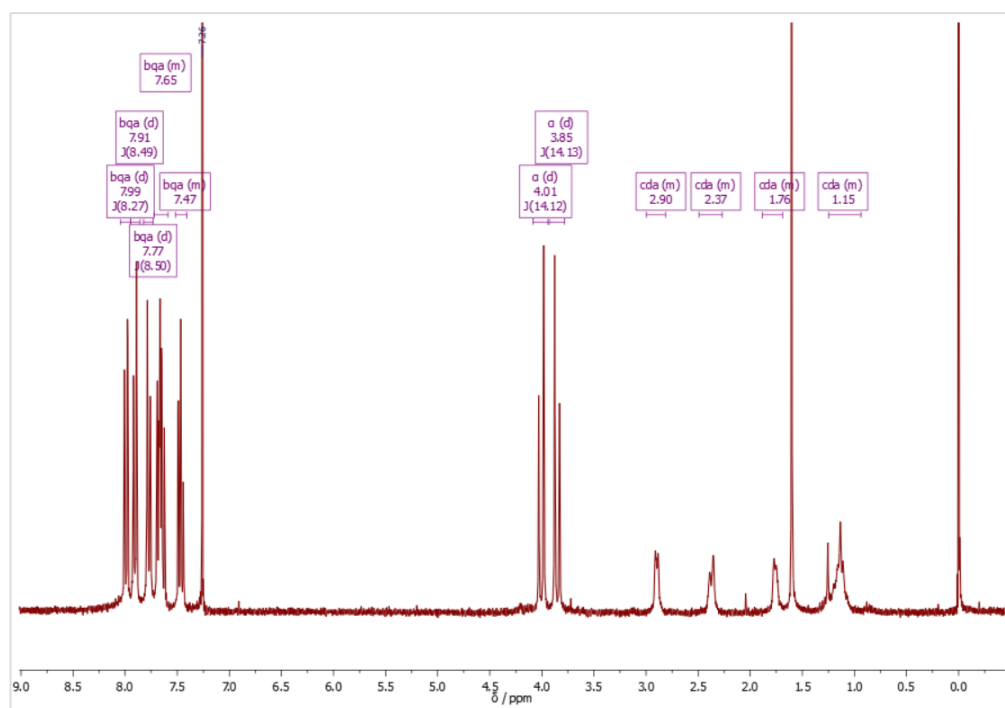

$^{13}\text{C}$  NMR (75 MHz,  $\text{CDCl}_3$ ) of **2**

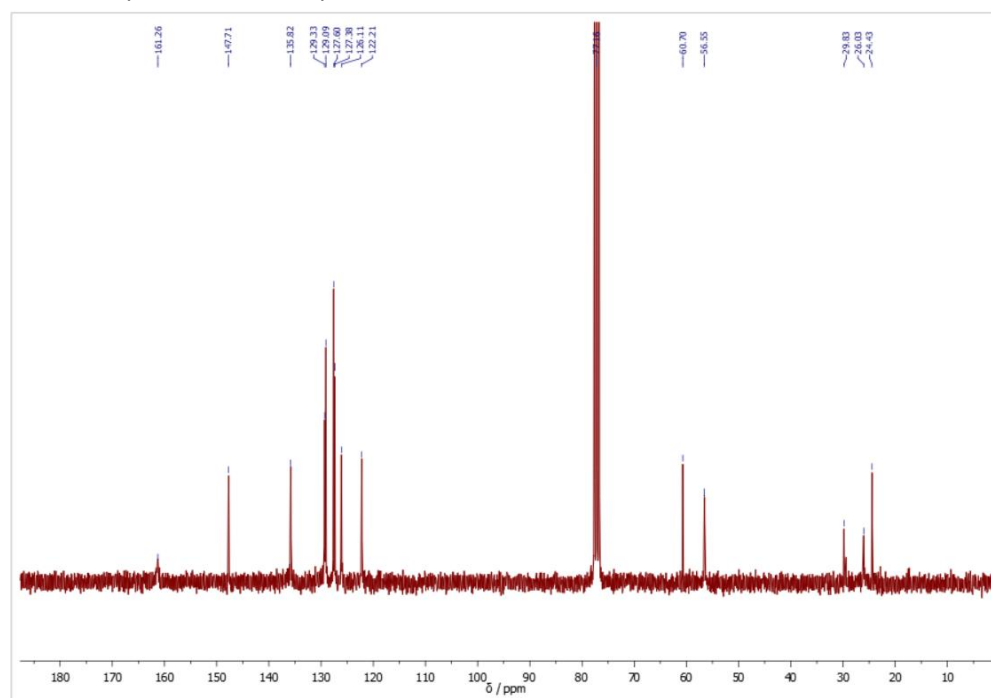

## X-ray Crystallography.

**Table S1.** Experimental data for the X-ray diffraction studies.

| Compound                                                          | <i>rac-5</i>                                                                                  |
|-------------------------------------------------------------------|-----------------------------------------------------------------------------------------------|
| Formula                                                           | C <sub>50</sub> H <sub>45</sub> F <sub>6</sub> FeN <sub>7</sub> O <sub>6</sub> S <sub>2</sub> |
| <i>F<sub>w</sub></i> (g mol <sup>-1</sup> )                       | 1073.90                                                                                       |
| Crystal system                                                    | Orthorhombic                                                                                  |
| Space group                                                       | <i>C m c a</i>                                                                                |
| <i>a</i> (Å)                                                      | 19.7874(9)                                                                                    |
| <i>b</i> (Å)                                                      | 42.5557(15)                                                                                   |
| <i>c</i> (Å)                                                      | 12.4013(4)                                                                                    |
| $\alpha$ (°)                                                      | 90                                                                                            |
| $\beta$ (°)                                                       | 90                                                                                            |
| $\gamma$ (°)                                                      | 90                                                                                            |
| <i>V</i> (Å <sup>3</sup> )                                        | 10442.7(7)                                                                                    |
| <i>Z</i>                                                          | 8                                                                                             |
| <i>D<sub>calc</sub></i> (g cm <sup>-3</sup> )                     | 1.366                                                                                         |
| <i>F</i> (000)                                                    | 4432                                                                                          |
| Radiation (Å)                                                     | 1.54184                                                                                       |
| Temperature (K)                                                   | 293(2)                                                                                        |
| Reflections collected                                             | 15441                                                                                         |
| Independent reflections                                           | 5532                                                                                          |
| <i>R<sub>init</sub></i>                                           | 0.0314                                                                                        |
| Reflections observed                                              | 4019                                                                                          |
| Parameters                                                        | 360                                                                                           |
| <i>R</i> <sub>1</sub> [ <i>I</i> > 2σ( <i>I</i> )] <sup>[a]</sup> | 0.0761                                                                                        |
| <i>wR</i> <sub>2</sub> (all data) <sup>[b]</sup>                  | 0.2537                                                                                        |
| Goof, <i>S</i> <sup>[c]</sup>                                     | 1.099                                                                                         |
| Maximum/minimum electron density (e Å <sup>-3</sup> )             | 0.685/−0.797                                                                                  |

<sup>[a]</sup>  $R_1 = \sum ||F_o| - |F_c|| / \sum |F_o|$ . <sup>[b]</sup>  $wR_2 = \{\sum [w(F_o^2 - F_c^2)^2] / \sum [w(F_o^2)^2]\}^{1/2}$ . <sup>[c]</sup>  $S = \{\sum [w(F_o^2 - F_c^2)^2] / (n - p)\}^{1/2}$  where n is number of reflections and p is the total number of parameters refined.

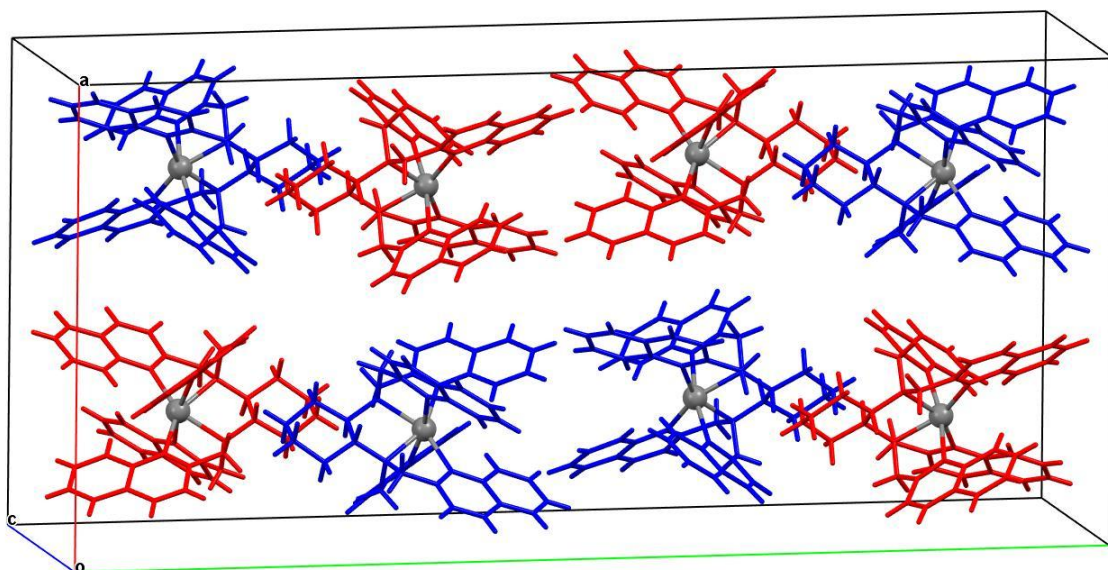

**Figure S2.** Packing of  $[\text{Fe}^{\text{II}}(\text{CDA-BQA}^*)]^{2+}$  complexes in *rac*-**5**. Individual enantiomers are shown in red and blue colours, respectively. Triflate anions and acetonitrile molecules are omitted for clarity.

**Table S2.** The calculated  $k_{\text{obs}}$  values in the reaction of **9** and flavanone in MeCN.

| $N_0$ | T<br>(K) | $[\mathbf{9}]_0$<br>( $10^{-3}$ M) | Flavanon<br>(M) | $k_{\text{obs}}$<br>( $10^{-2}\text{s}^{-1}$ ) |
|-------|----------|------------------------------------|-----------------|------------------------------------------------|
| 1     | 283      | 2                                  | 0.02            | $1.37 \pm 0.05$                                |
| 2     | 283      | 2                                  | 0.03            | $1.93 \pm 0.09$                                |
| 3     | 283      | 2                                  | 0.04            | $2.58 \pm 0.13$                                |
| 4     | 283      | 2                                  | 0.05            | $3.50 \pm 0.14$                                |
| 5     | 283      | 2                                  | 0.06            | $4.03 \pm 0.16$                                |
| 6     | 283      | 2                                  | 0.08            | $5.41 \pm 0.19$                                |
| 7     | 288      | 2                                  | 0.05            | $4.68 \pm 0.16$                                |
| 8     | 293      | 2                                  | 0.05            | $5.58 \pm 0.20$                                |
| 9     | 298      | 2                                  | 0.05            | $6.70 \pm 0.22$                                |

**Table S3.** The calculated  $k_{\text{obs}}$  values in the reaction of **9** and flavanone in MeCN/TFE.

| $N_0$ | T<br>(K) | $[\mathbf{9}]_0$<br>( $10^{-3}$ M) | Flavanon<br>(M) | $k_{\text{obs}}$<br>( $10^{-2}\text{s}^{-1}$ ) |
|-------|----------|------------------------------------|-----------------|------------------------------------------------|
| 1     | 283      | 2                                  | 0.02            | $2.64 \pm 0.1$                                 |
| 2     | 283      | 2                                  | 0.03            | $4.28 \pm 0.24$                                |
| 3     | 283      | 2                                  | 0.04            | $5.99 \pm 0.27$                                |

**Table S4.** The calculated  $k_{obs}$  values in the reaction of **11** and flavanone in MeCN.

| <b>N<sub>0</sub></b> | <b>T<br/>(K)</b> | <b>[11]<sub>0</sub><br/>(10<sup>-3</sup> M)</b> | <b>Flavanon<br/>(M)</b> | <b>k<sub>obs</sub><br/>(10<sup>-2</sup>s<sup>-1</sup>)</b> |
|----------------------|------------------|-------------------------------------------------|-------------------------|------------------------------------------------------------|
| 1                    | 283              | 2                                               | 0.03                    | 3.11±0.06                                                  |
| 2                    | 283              | 2                                               | 0.04                    | 4.01±0.08                                                  |
| 3                    | 283              | 2                                               | 0.05                    | 5.21±0.14                                                  |
| 4                    | 283              | 2                                               | 0.10                    | 9.70±0.31                                                  |

**Table S5.** The calculated  $k_{obs}$  values in the reaction of **10** and flavanone in MeCN/TFE.

| <b>N<sub>0</sub></b> | <b>T<br/>(K)</b> | <b>[10]<sub>0</sub><br/>(10<sup>-3</sup> M)</b> | <b>Flavanon<br/>(M)</b> | <b>k<sub>obs</sub><br/>(10<sup>-2</sup>s<sup>-1</sup>)</b> |
|----------------------|------------------|-------------------------------------------------|-------------------------|------------------------------------------------------------|
| 1                    | 283              | 2                                               | 0.02                    | 0.848±0.02                                                 |
| 2                    | 283              | 2                                               | 0.03                    | 1.27±0.04                                                  |
| 3                    | 283              | 2                                               | 0.04                    | 1.59±0.05                                                  |
| 4                    | 283              | 2                                               | 0.05                    | 2.07±0.06                                                  |
| 5                    | 288              | 2                                               | 0.05                    | 1.30±0.03                                                  |
| 6                    | 293              | 2                                               | 0.05                    | 1.67±0.04                                                  |
| 7                    | 298              | 2                                               | 0.05                    | 2.28±0.08                                                  |
